# Supplementary material for: A pH-activated autocatalytic nanoreactor for self-boosting Fenton-like chemodynamic therapy
Source: Royal Society of Chemistry journal article supplement (doi:10.1039/d0nr03135f), 2020-01-01
Supplement: d0nr03135f1.pdf [file d0nr03135f1.pdf]

## Supporting Information

### **A pH-Activated Autocatalytic Nanoreactor for Self-Boosted Fenton-like Chemodynamic Therapy**

Hongshuai Wu,<sup>a</sup> Fanghui Chen,<sup>a</sup> Dihai Gu,<sup>a</sup> Chaoqun You,<sup>\*,b</sup> Baiwang Sun<sup>\*,a</sup>

<sup>a</sup> *School of Chemistry and Chemical Engineering, Southeast University, Nanjing 211189, PR China. E-mail address: chmsunbw@seu.edu.cn*

<sup>b</sup> *Jiangsu Co-Innovation Centre for Efficient Processing and Utilization of Forest Resources, Nanjing Forestry University, Nanjing 210037, PR China. E-mail address: chemyoucq@njfu.edu.cn*

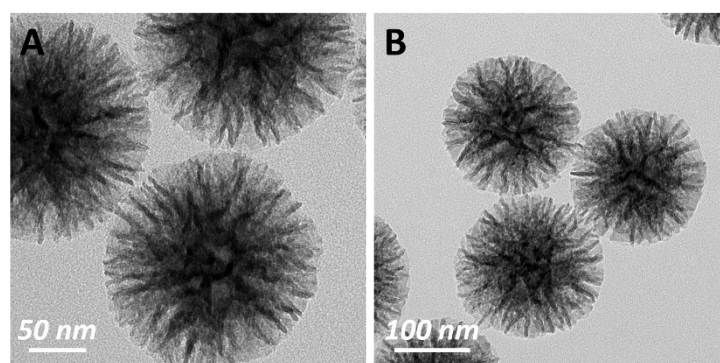

**Figure S1.** TEM images of (A) DMONs and (B) NH<sub>2</sub>-DMONs.

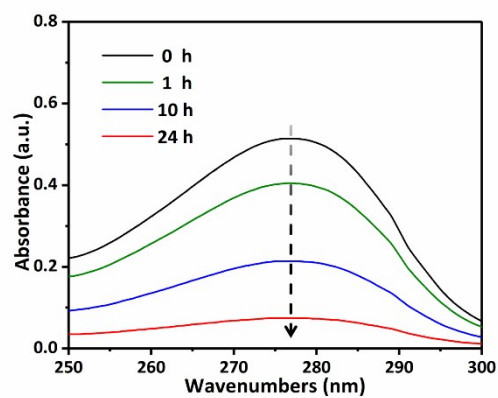

**Figure S2.** UV-vis spectra of GOx supernatant after incubation with COOH-DMONs for different time.

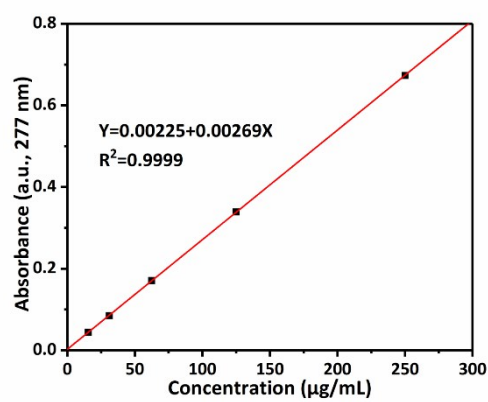

**Figure S3.** The standard curve of GOx.

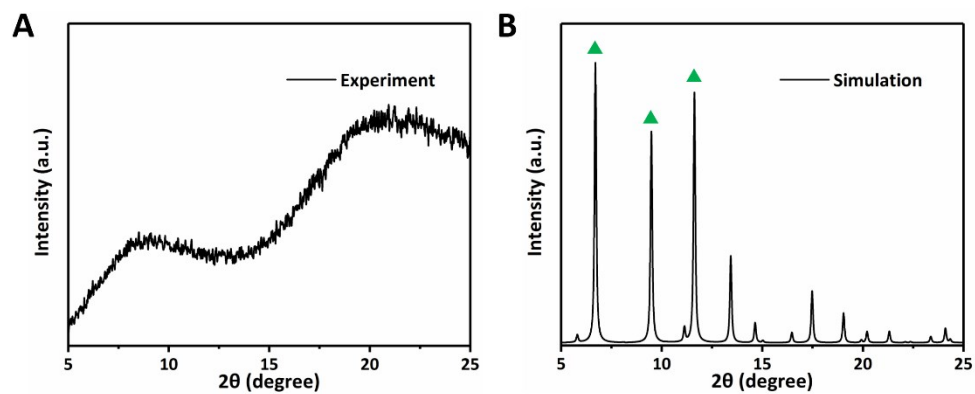

**Figure S4.** (A) Experimental XRD spectrum of GOx. (B) Simulated XRD spectrum of HKUST-1.

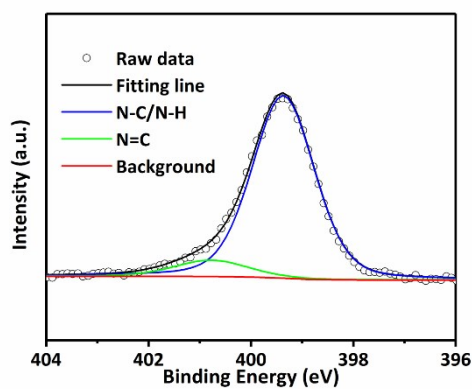

**Figure S5.** The high-resolution N 1s XPS spectra of HT@GOx-DMONs.

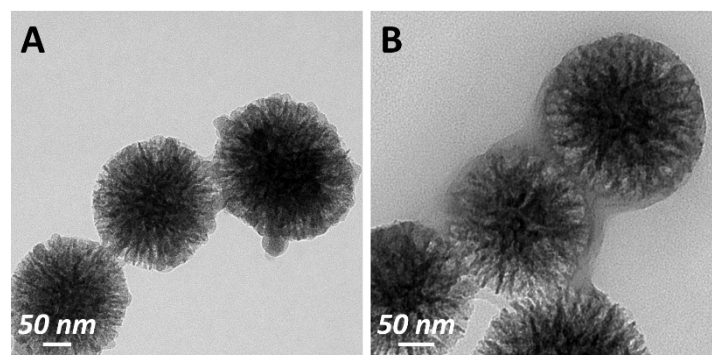

**Figure S6.** TEM images of HT@GOx-DMONs after 12 h of incubation at pH (A) 7.4 and (B) 5.0.

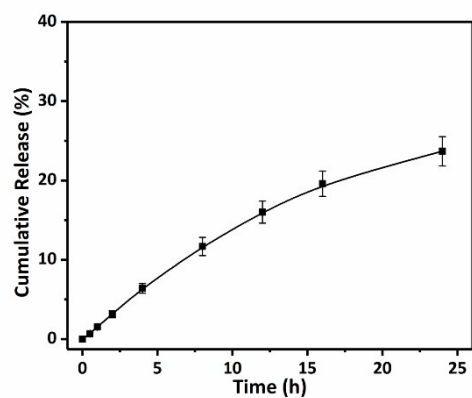

**Figure S7.** The accumulated release of GOx from GOx-DMONs at pH 7.4.

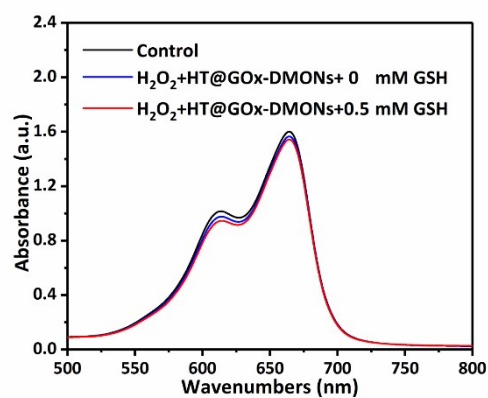

**Figure S8.** UV/Vis absorption spectra of MB incubated with H<sub>2</sub>O<sub>2</sub> plus HT@GOx-DMONs after treatment with pH 7.4 under the presence of GSH.

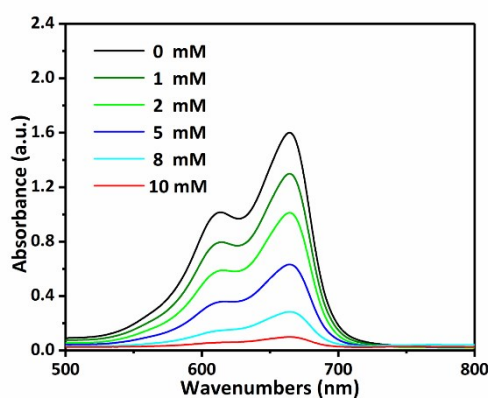

**Figure S9.** MB degradation by acid-treated HT@GOx-DMONs plus different concentrations of H<sub>2</sub>O<sub>2</sub>.

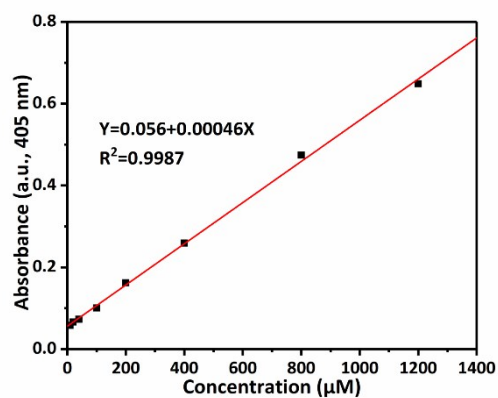

**Figure S10.** The standard curve of  $\text{H}_2\text{O}_2$ .

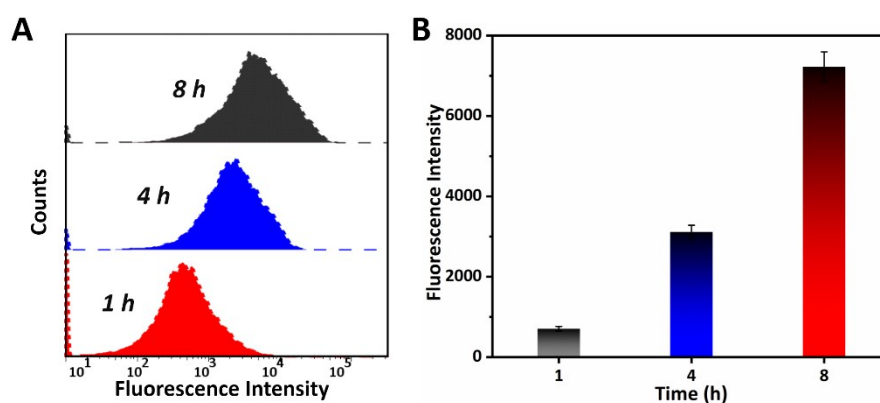

**Figure S11.** (A) Flow cytometry analysis and (B) corresponding line chart of RhB fluorescence intensity in MCF-7 cells incubated with RhB-doped HT@GOx-DMONs for various time.

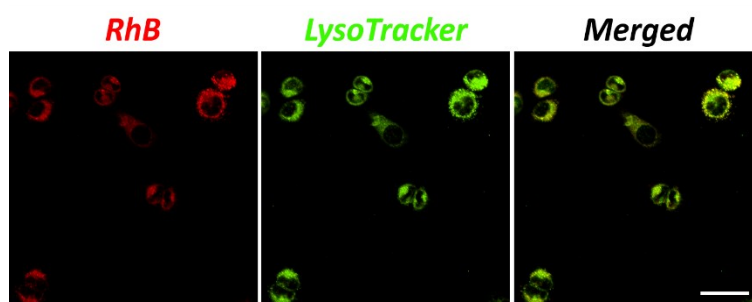

**Figure S12.** CLSM images of MCF-7 cells incubated with RhB-doped HT@GOx-DMONs for 4 h.

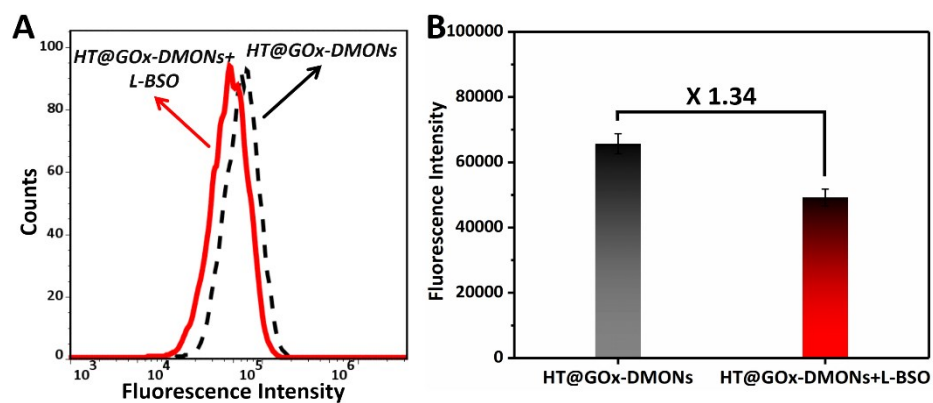

**Figure S13.** (A) Flow cytometry detection and (B) corresponding bar graph of ROS production under the presence of DCFH-DA in MCF-7 cells treated with HT@GOx-DMONs and HT@GOx-DMONs plus L-BSO for 8 h.

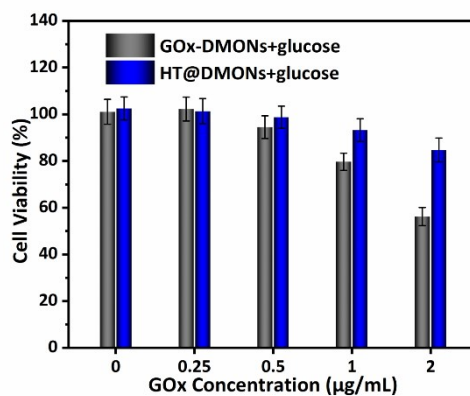

**Figure S14.** Cell viability of MCF-7 cells treated with GOx-DMONs plus glucose and HT@DMONs plus glucose for 24 h.

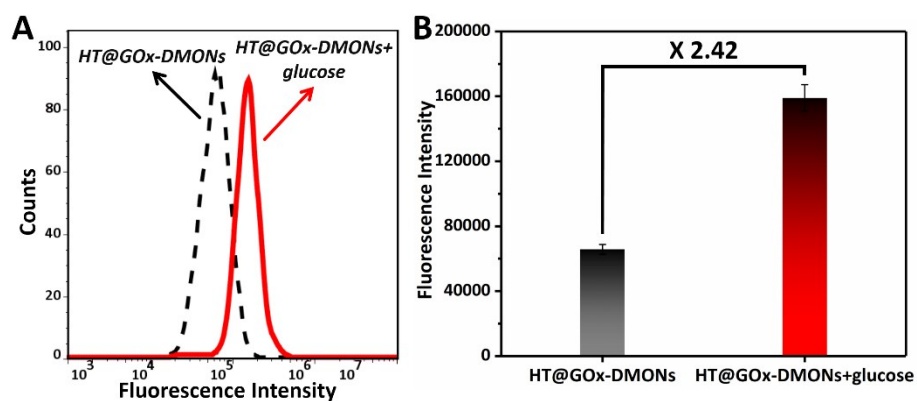

**Figure S15.** (A) Flow cytometry detection and (B) corresponding bar graph of ROS production under the presence of DCFH-DA in MCF-7 cells treated with HT@GOx-DMONs and HT@GOx-DMONs plus glucose for 8 h.

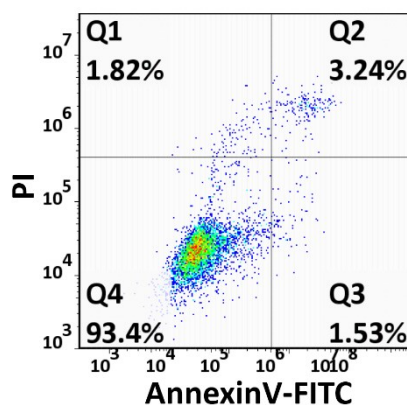

**Figure S16.** Flow cytometry analysis of apoptosis for MCF-7 cells incubated with L-BSO for 24 h.

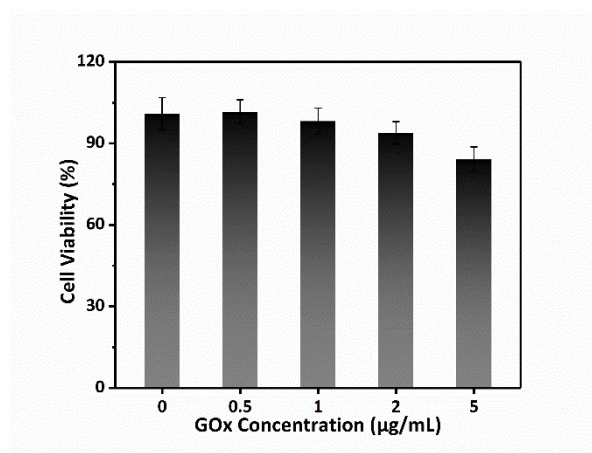

**Figure S17.** Cell viability of L929 cells incubated with HT@GOx-DMONs for 24 h.

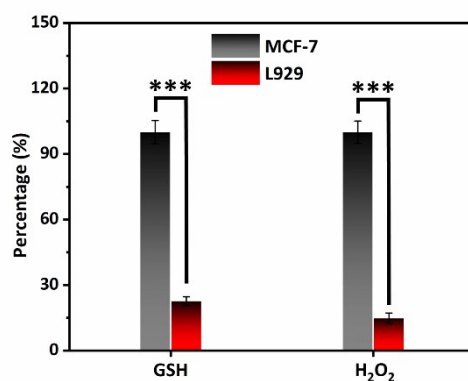

**Figure S18.** The comparison of GSH and H<sub>2</sub>O<sub>2</sub> levels in MCF-7 and L929 cells.

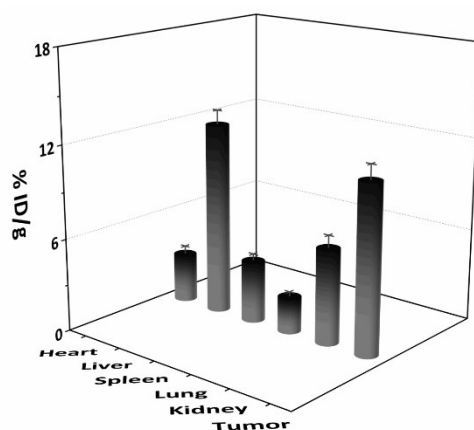

**Figure S19.** *In vivo* biodistribution of Cu in major organs and tumor after 24 h of post injection with HT@GOx-DMONs.



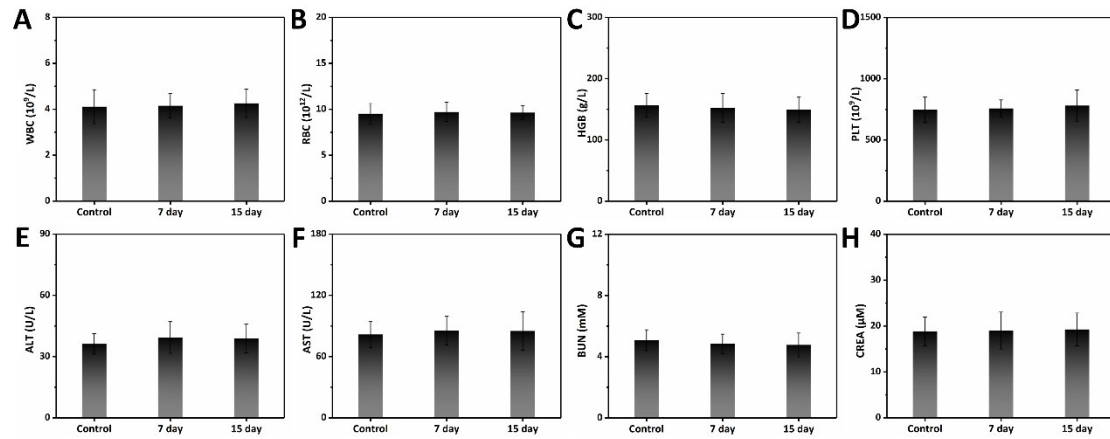

**Figure S20.** Hematology analysis of mice after 7 and 15 days of post administration with HT@GOx-DMONs. The terms included (A) WBC, (B) RBC, (C) HGB, (D) PLT, (E) ALT, (F) AST, (G) BUN and (H) CREA.

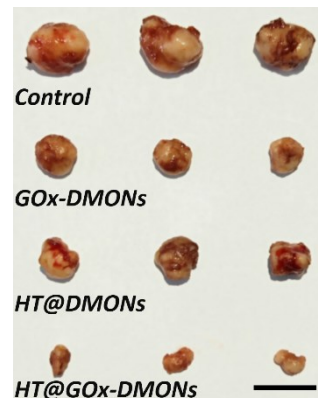

**Figure S21.** The photographs of all tumors taken from various groups of mice after 15 days of treatments. Scale bar: 1 cm.
